# Supplementary material for: Use of Wastewater Metrics to Track COVID-19 in the US
Source: PubMed Central journal article supplement (PMC10372707; doi:10.1001/jamanetworkopen.2023.25591), 2023-07-26
Supplement: jamanetwopen-e2325591-s001.pdf [file jamanetwopen-e2325591-s001.pdf]

## Supplemental Online Content

Varkila MRJ, Montez-Rath ME, Salomon JA, et al. Use of wastewater metrics to track COVID-19 in the US. *JAMA Netw Open*. 2023;6(7):e2325591. doi:10.1001/jamanetworkopen.2023.25591

**eTable.** Sampled County Population and Sewershed Data, and Case and Hospitalization Rates by Quarters of 2022

**eFigure 1.** Diagnostic Testing and Reported New COVID-19 Cases in the US Between March 1, 2020, and September 30, 2022

**eFigure 2.** Selection of Counties Included in Analysis

**eFigure 3.** Changes in Wastewater Percentile Value as New Data Becomes Available, Wayne County, Michigan, as an Illustrative Example

**eFigure 4.** Time History of Wastewater Surveillance Data and Clinical Case Metrics From the Most Populous Counties in US Census Regions Midwest and Northeast Between January 2022 and September 2022

**eFigure 5.** Performance of Wastewater Percentile in Reference to Clinical Case Metrics in Small US Counties (n=230) Stratified by Calendar Quartile of 2022

**eFigure 6.** Performance of Wastewater Percentile in Reference to Clinical Case Metrics in Large US Counties (n=38) Stratified by Calendar Quartile of 2022

**eFigure 7.** Performance of 15-Day Wastewater Percent Change in Reference to Clinical Case Metrics Stratified by Calendar Quartile of 2022

**eFigure 8.** Performance of Combined Wastewater Metrics in Reference to Clinical Case Metrics Stratified by Calendar Quartile of 2022

**eFigure 9.** Performance of Current Reported COVID-19 Case Rates in Reference to Clinical Case Metrics Stratified by Calendar Quartile of 2022

**eFigure 10.** Performance of Current COVID-19 Hospital Admission Rate in Reference to Clinical Case Metrics Stratified by Calendar Quartile of 2022

This supplemental material has been provided by the authors to give readers additional information about their work.

**eTable. Sampled County Population and Sewershed Data, and Case and Hospitalization Rates by Quarters of 2022**

|                                                | Jan-Mar 2022<br>(n=268) |      |            |       |        | Apr-Jun 2022<br>(n=268) |      |            |       |        | Jul-Sep 2022<br>(n=263) |      |            |       |        |
|------------------------------------------------|-------------------------|------|------------|-------|--------|-------------------------|------|------------|-------|--------|-------------------------|------|------------|-------|--------|
|                                                | Median                  | Min  | Max        | 25th  | 75th   | Median                  | Min  | Max        | 25th  | 75th   | Median                  | Min  | Max        | 25th  | 75th   |
| Weeks with available data, number              | 13                      | 1    | 13         | 12    | 13     | 13                      | 4    | 13         | 13    | 13     | 13                      | 8    | 13         | 13    | 13     |
| Wastewater sites per county, number            | 1                       | 1    | 33         | 1     | 2      | 1                       | 1    | 33         | 1     | 2      | 1                       | 1    | 33         | 1     | 2      |
| Total county population,                       | 95938                   | 8376 | 9829544    | 44697 | 294772 | 95938                   | 8376 | 9829544    | 44697 | 294772 | 96017                   | 8376 | 9829544    | 45242 | 299647 |
| County population served by sampled sewersheds | 49831                   | 3076 | 3500000    | 14292 | 221250 | 49831                   | 3076 | 3500000    | 14292 | 221250 | 49662                   | 3076 | 3500000    | 14410 | 198804 |
| Wastewater percentile level, %                 | 46.6                    | 0    | 100        | 17.0  | 83.5   | 44.4                    | 0    | 95.8       | 25.0  | 62.2   | 60.5                    | 1.50 | 100.0      | 47.7  | 72.2   |
| 15-day percent change variable, %              | -42                     | -100 | 2147483647 | -80.0 | 51     | 30                      | -100 | 2147483647 | -39   | 226    | -8                      | -100 | 2147483647 | -60   | 91     |
| New cases per 100,000 population               | 245.8                   | 3.0  | 4728.6     | 73.3  | 928.1  | 132.1                   | 0    | 826.3      | 59.9  | 210.7  | 180.0                   | 24.4 | 994.5      | 128.5 | 238.1  |
| New hospitalizations per 100,000 population    | 11.5                    | 0    | 291.7      | 4.2   | 27.7   | 4.8                     | 0    | 70.9       | 2.0   | 9.3    | 9.6                     | 0    | 124.2      | 5.4   | 15.5   |

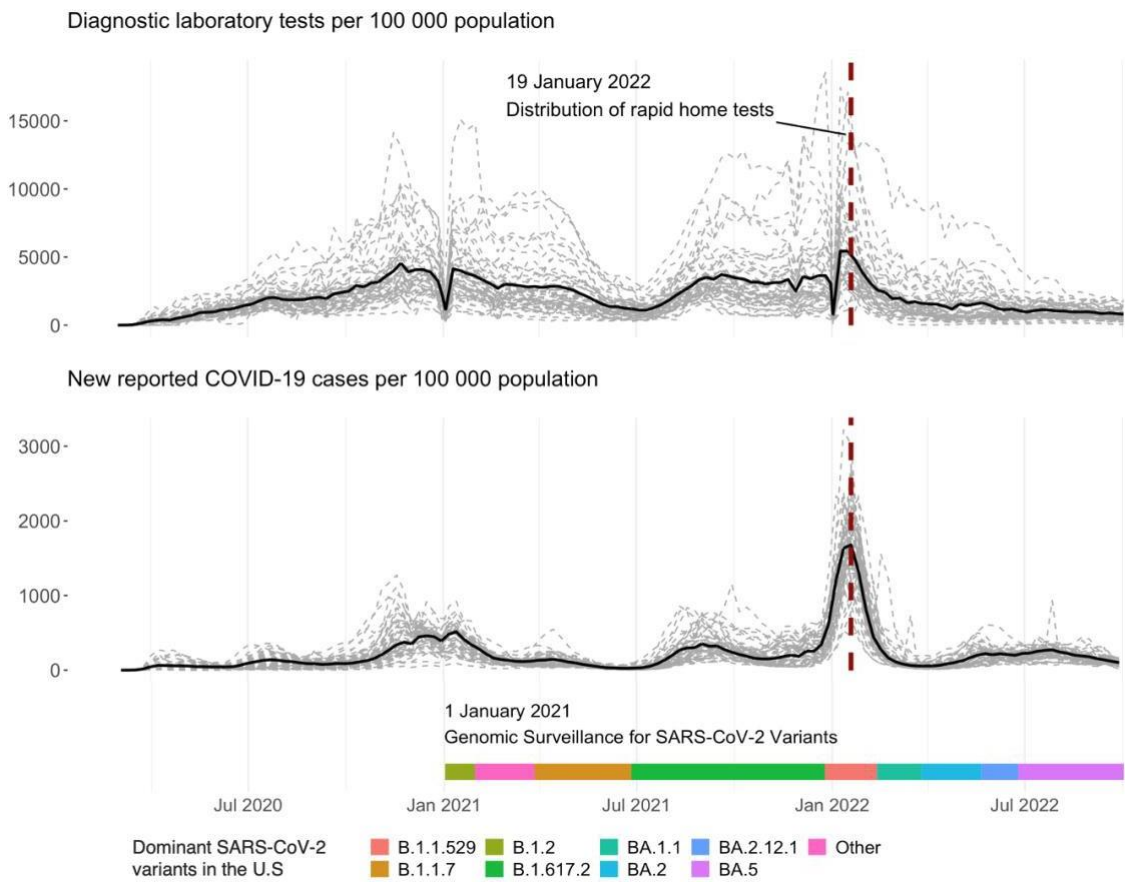

**eFigure 1. Diagnostic Testing and Reported New COVID-19 Cases in the US Between March 1, 2020, and September 30, 2022**

The dashed gray lines represent weekly totals of diagnostic laboratory tests (top) and new reported COVID-19 cases (bottom) per 100,000 population by state. The solid black line shows total numbers for the United States. The colored horizontal bars represent time periods during which specific SARS-CoV-2 variants were dominant in the United States reported by the CDC as of January 1 2021. The dashed vertical line shows the date when distribution of rapid home tests was announced by the Biden administration.

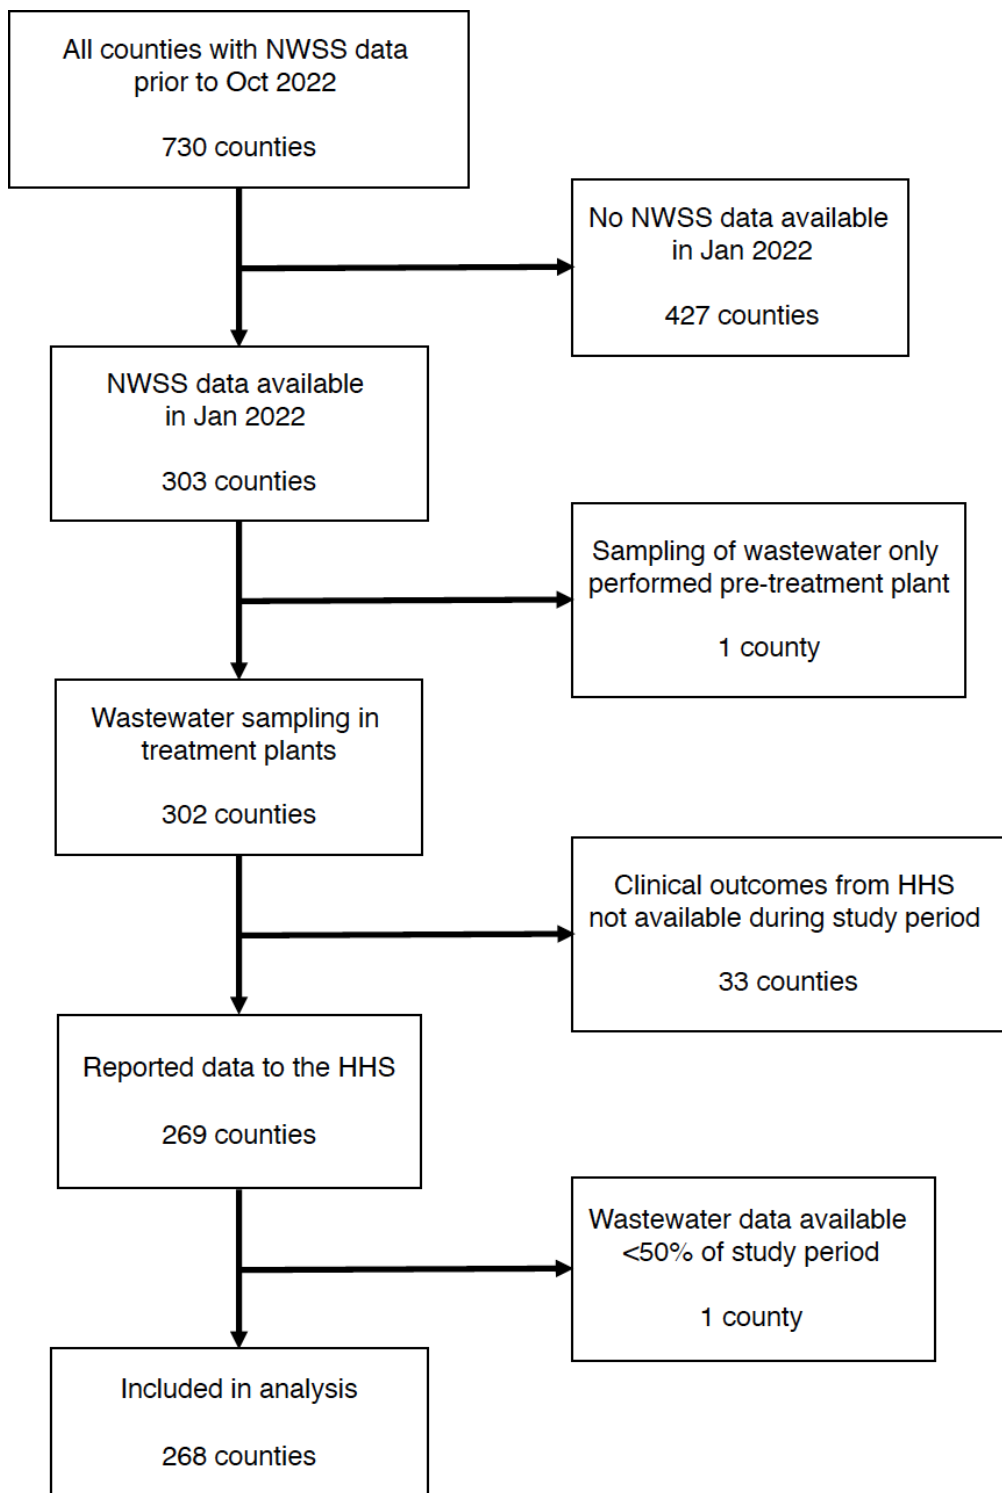

**eFigure 2. Selection of Counties Included in Analysis**

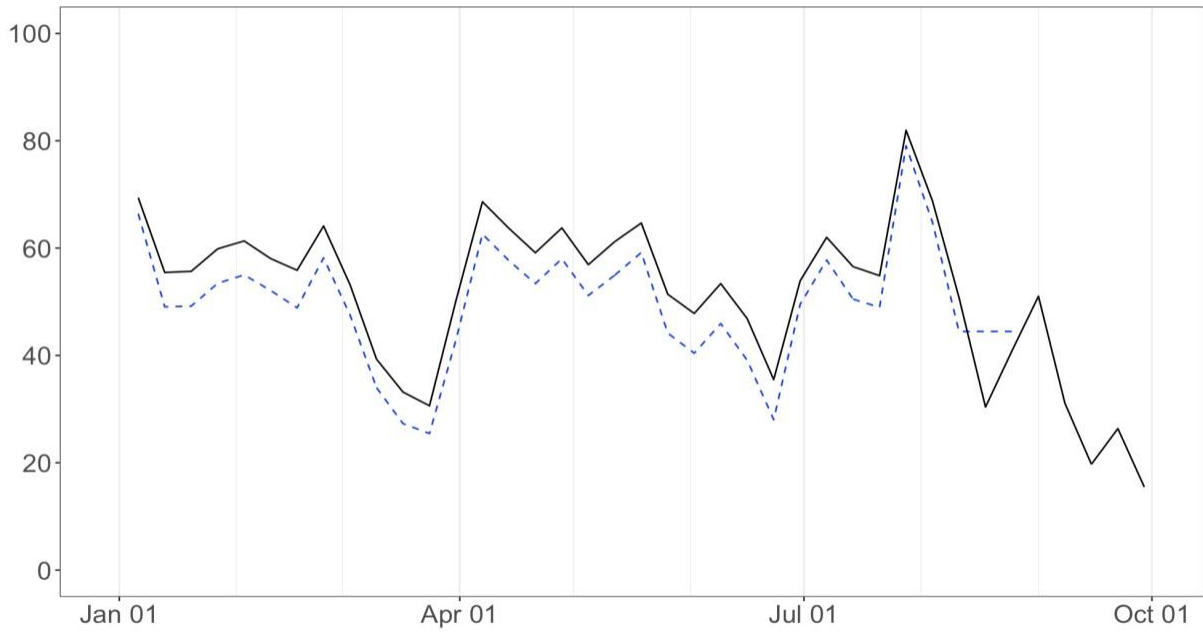

**eFigure 3. Changes in Wastewater Percentile Value as New Data Becomes Available, Wayne County, Michigan, as an Illustrative Example**

The blue dashed line represents wastewater percentile values from data downloaded in August 2022 and the black solid line represents values from data downloaded in October 2022.

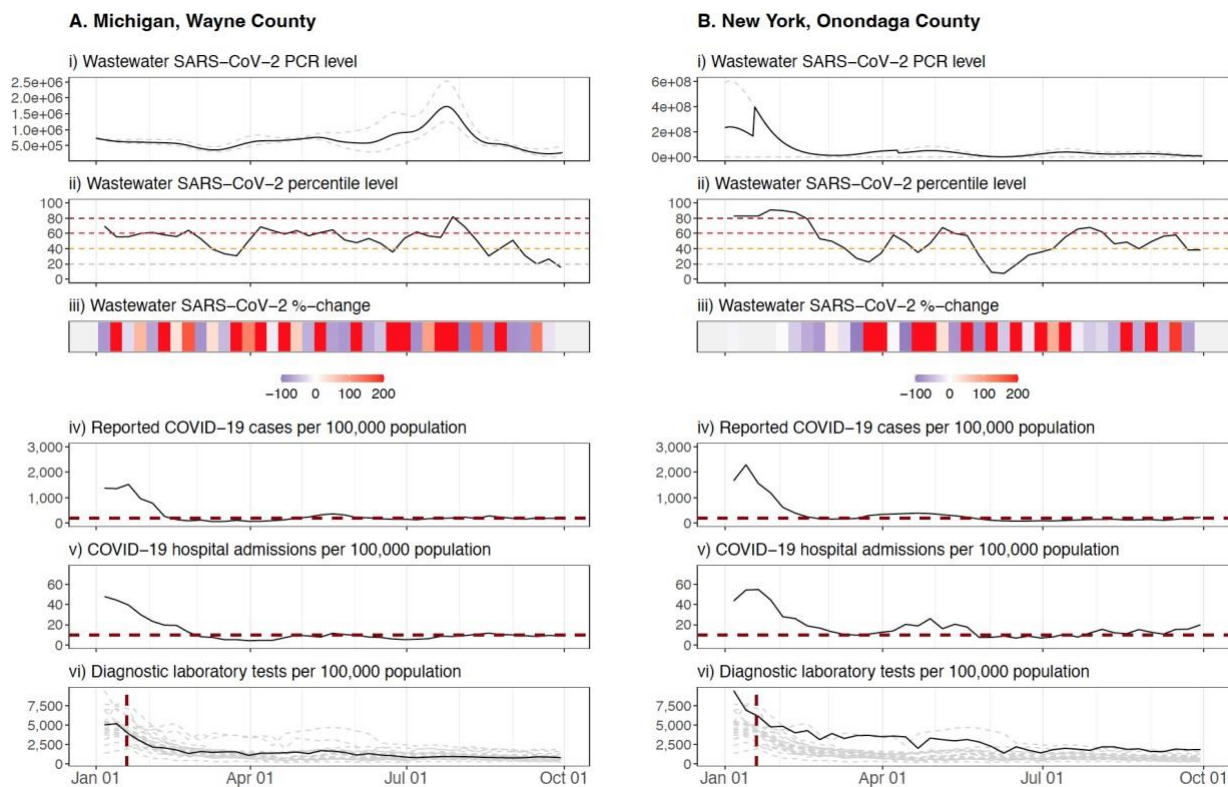

**eFigure 4. Time History of Wastewater Surveillance Data and Clinical Case Metrics From the Most Populous Counties in US Census Regions Midwest and Northeast Between January 2022 and September 2022**

Data are shown for the most populous counties in U.S. Census regions (A) Midwest: Wayne County, Michigan, and (B) Northeast: Onondaga County, New York. Panel (i) shows smoothed spline-fit PCR concentrations of SARS-CoV-2 for each sampling location as reported by the CDC NWSS. When multiple sewersheds were sampled within a county, dashed grey lines in panel (i) represent individual sewersheds. The solid black lines in panels (i), (ii) wastewater SARS-CoV-2 percentile level, and (iii) wastewater SARS-CoV-2 15-day percent change show weighted mean values using each sewershed's population served. Horizontal dashed lines in panels (iv) and (v) show thresholds for high COVID-19 community level (reported COVID-19 case rate equal to or greater than 200 per 100,000 population and reported hospitalization rate equal to or greater than 10 new inpatient admissions per 100,000 population, respectively). Panel (vi) shows state-level data (solid black lines show reported tests from the state of Michigan (A), and New York (B); dashed grey lines show estimates for all other U.S. states).

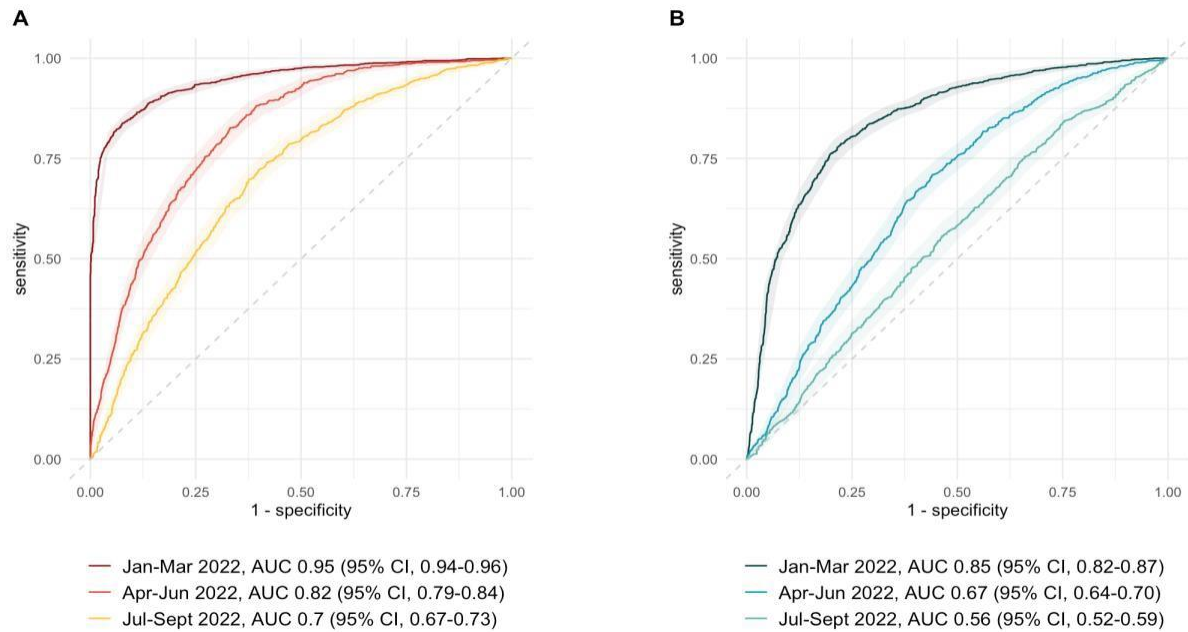

**eFigure 5. Performance of Wastewater Percentile in Reference to Clinical Case Metrics in Small US Counties (n=230) Stratified by Calendar Quartile of 2022**

AUC of wastewater percentile in reference to (A) Current reported COVID-19 cases ( $\geq 200$  per 100,000 population), (B) New hospital admissions in two weeks ( $\geq 10$  per 100,000 population). Small counties were defined as counties with a total population less than 500,000 according to the 2021 U.S. Census.

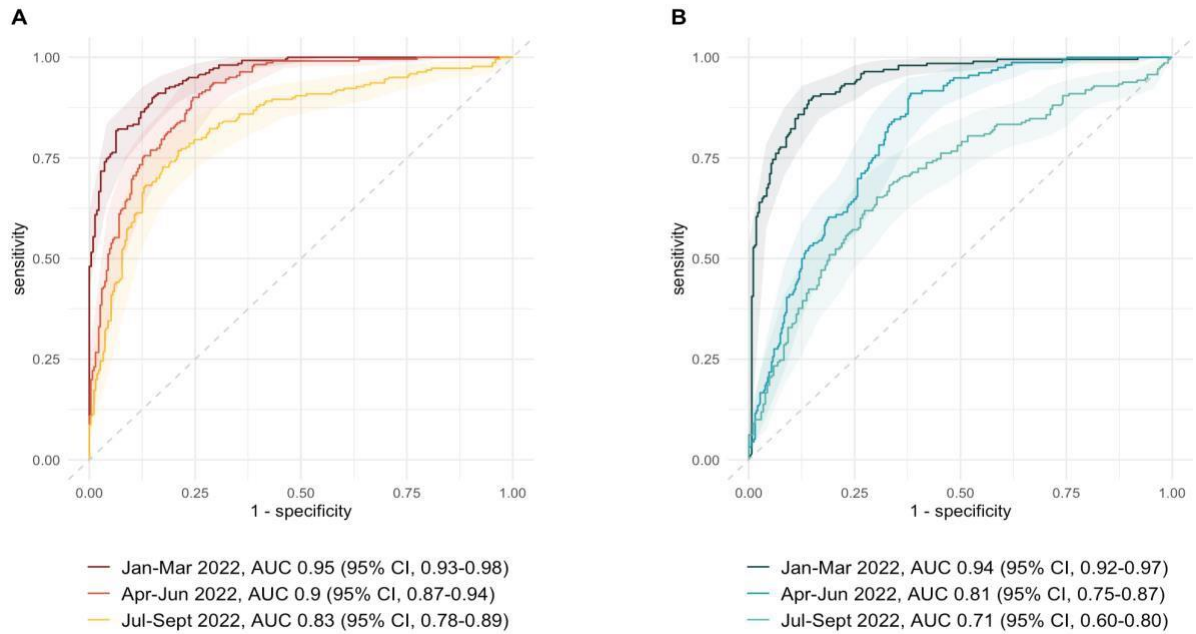

**eFigure 6. Performance of Wastewater Percentile in Reference to Clinical Case Metrics in Large US Counties (n=38) Stratified by Calendar Quartile of 2022**

AUC of wastewater percentile in reference to (A) Current reported COVID-19 cases ( $\geq 200$  per 100,000 population), (B) New hospital admissions in two weeks ( $\geq 10$  per 100,000 population). Large counties were defined as counties with a total population equal to or greater than 500,000 according to the 2021 U.S. Census.



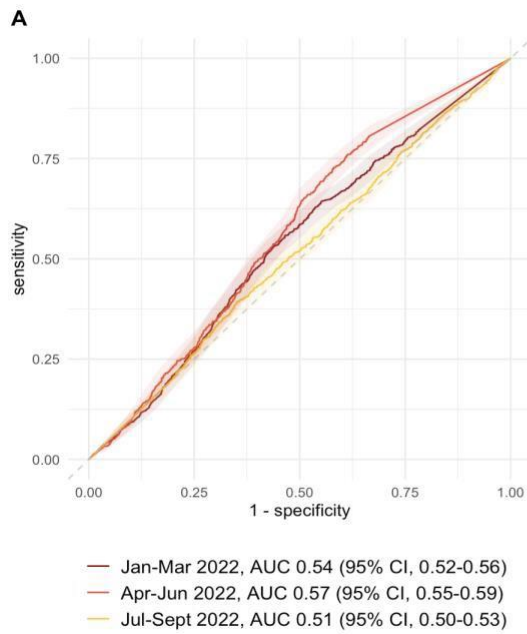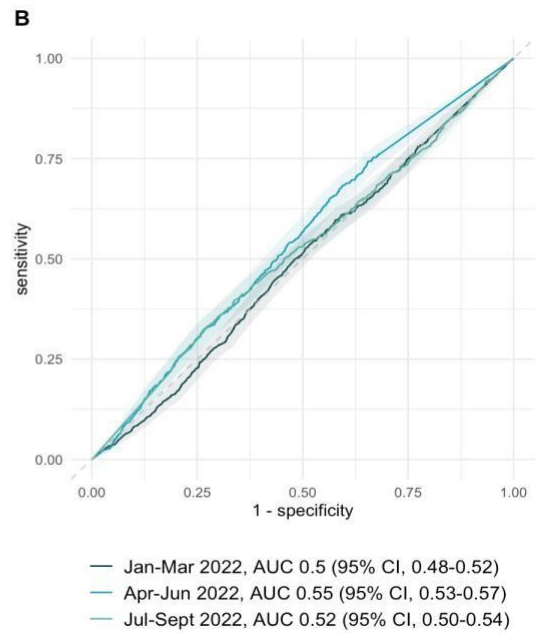

**eFigure 7. Performance of 15-Day Wastewater Percent Change in Reference to Clinical Case Metrics Stratified by Calendar Quartile of 2022**

AUC of 15-day wastewater percent change in reference to (A) Current reported COVID-19 cases ( $\geq 200$  per 100,000 population), (B) New hospital admissions in two weeks ( $\geq 10$  per 100,000 population). @

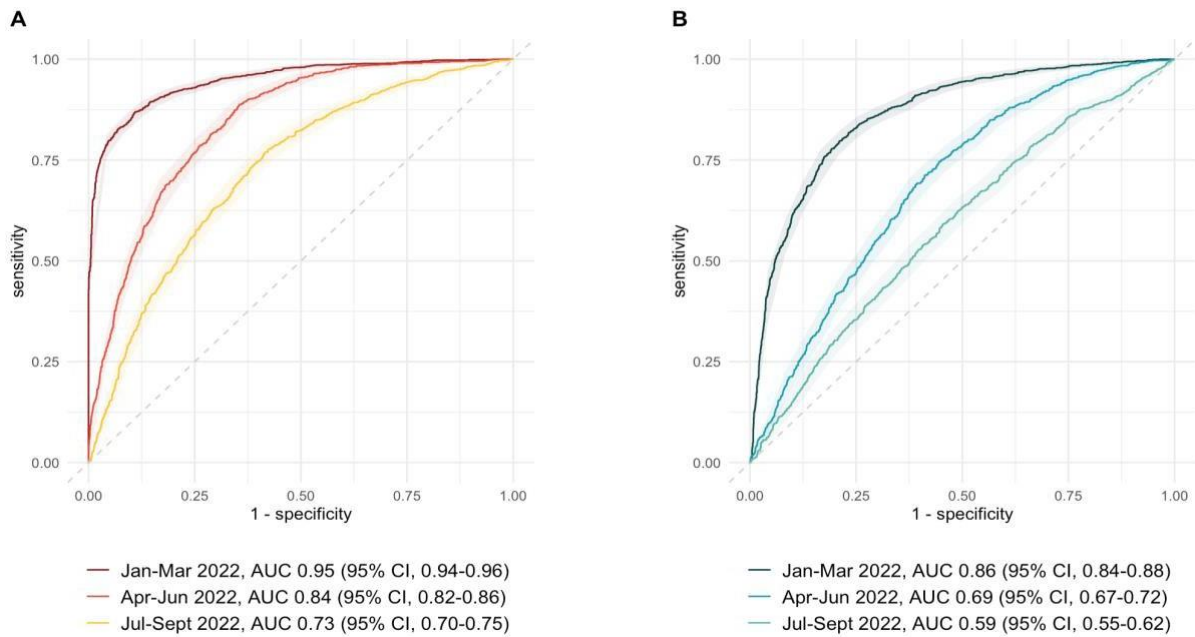

**eFigure 8. Performance of Combined Wastewater Metrics in Reference to Clinical Case Metrics Stratified by Calendar Quartile of 2022**

AUC of combined wastewater metrics in reference to (A) Current reported COVID-19 cases ( $\geq 200$  per 100,000 population), (B) New hospital admissions in two weeks ( $\geq 10$  per 100,000 population). To estimate combined effects of wastewater metrics we used logistic regression accounting for wastewater percentile, percent change, and the interaction of the two.

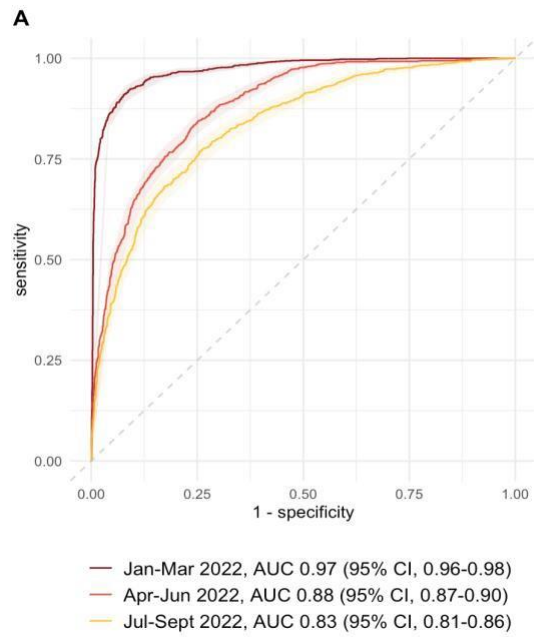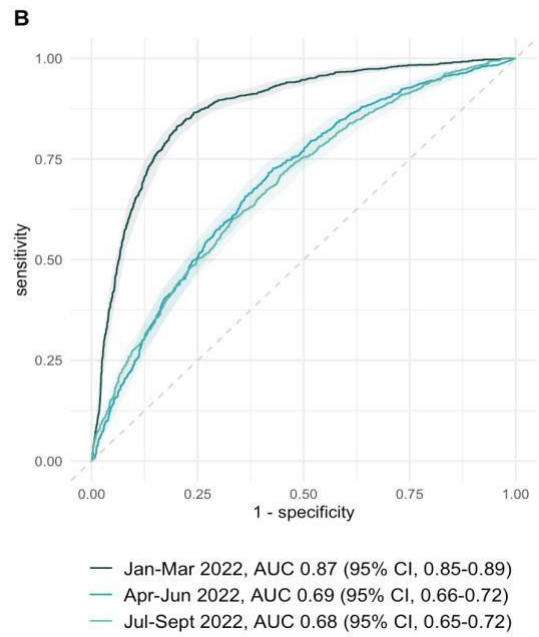

**eFigure 9. Performance of Current Reported COVID-19 Case Rates in Reference to Clinical Case Metrics Stratified by Calendar Quartile of 2022**

AUC of current reported case rates in reference to (A) reported COVID-19 cases in two weeks ( $\geq 200$  per 100,000 population), (B) New hospital admissions in two weeks ( $\geq 10$  per 100,000 population).

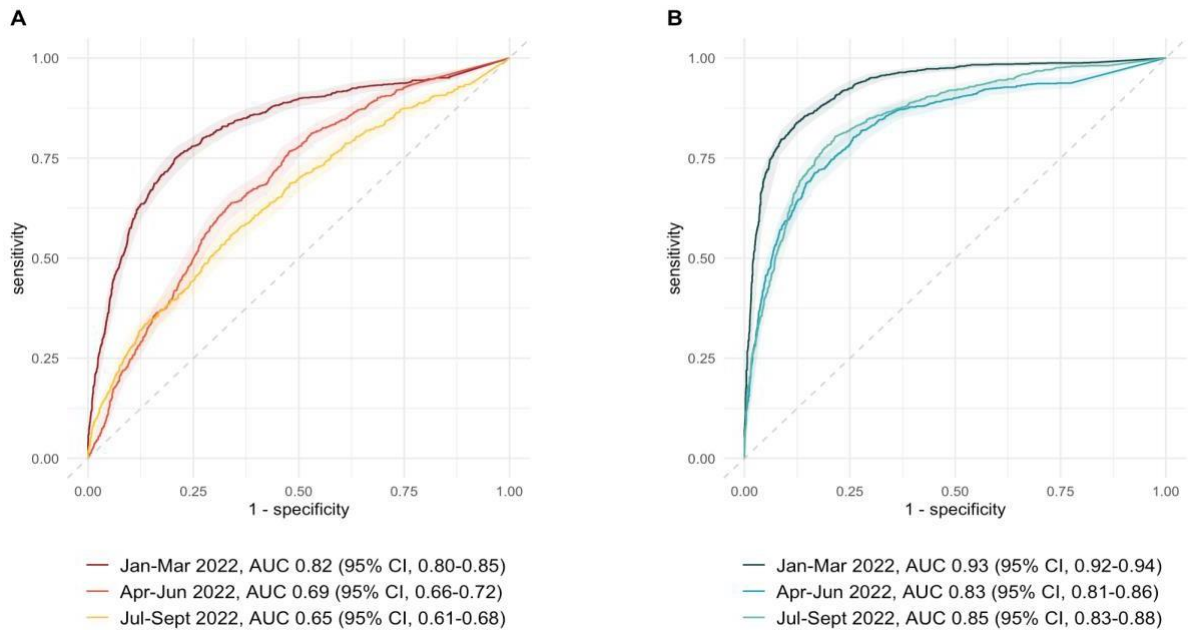

**eFigure 10. Performance of Current COVID-19 Hospital Admission Rate in Reference to Clinical Case Metrics Stratified by Calendar Quartile of 2022**

AUC of current hospitalization rates in reference to (A) reported COVID-19 cases in two weeks ( $\geq 200$  per 100,000 population), (B) New hospital admissions in two weeks ( $\geq 10$  per 100,000 population).
